# Supplementary material for: Protein powder supplementation in early pregnancy and the risk of gestational diabetes mellitus: a prospective cohort study
Source: Royal Society of Chemistry journal article supplement (doi:10.1039/d2fo03609f), 2023-01-01
Supplement: d2fo03609f1.pdf [file d2fo03609f1.pdf]

**Protein powder supplementation in early pregnancy and the risk of gestational  
diabetes mellitus: a prospective cohort study**

Meng Yang<sup>1\*</sup>, Zhongqiang Cao<sup>1\*</sup>, Jieqiong Zhou<sup>2</sup>, Jiuying Liu<sup>2</sup>, Yuanyuan Zhong<sup>2</sup>,  
Yan Zhou<sup>2</sup>, Xiaonan Cai<sup>1</sup>, Linling Yu<sup>3</sup>, Liqin Hu<sup>1</sup>, Han Xiao<sup>1†</sup>, Aifen Zhou<sup>1†</sup>

**Affiliations:**

<sup>1</sup>Institute of Maternal and Child Health, Wuhan Children's Hospital (Wuhan Maternal and Child Health care Hospital), Tongji Medical College, Huazhong University of Science and Technology, Wuhan, China.

<sup>2</sup>Department of Occupational and Environmental Health, School of Public Health, Tongji Medical College, Huazhong University of Science and Technology, Wuhan, Hubei 430030, China.

]

\*These authors contributed equally to this article.

†**Corresponding author:** Aifen Zhou, [april1972@163.com](mailto:april1972@163.com), and Han Xiao,  
[tjxiaohan1980@163.com](mailto:tjxiaohan1980@163.com)

Figure S1: Density of the estimated propensity score for participants who did and did not use the protein powder supplements in the unadjusted and adjusted sample.

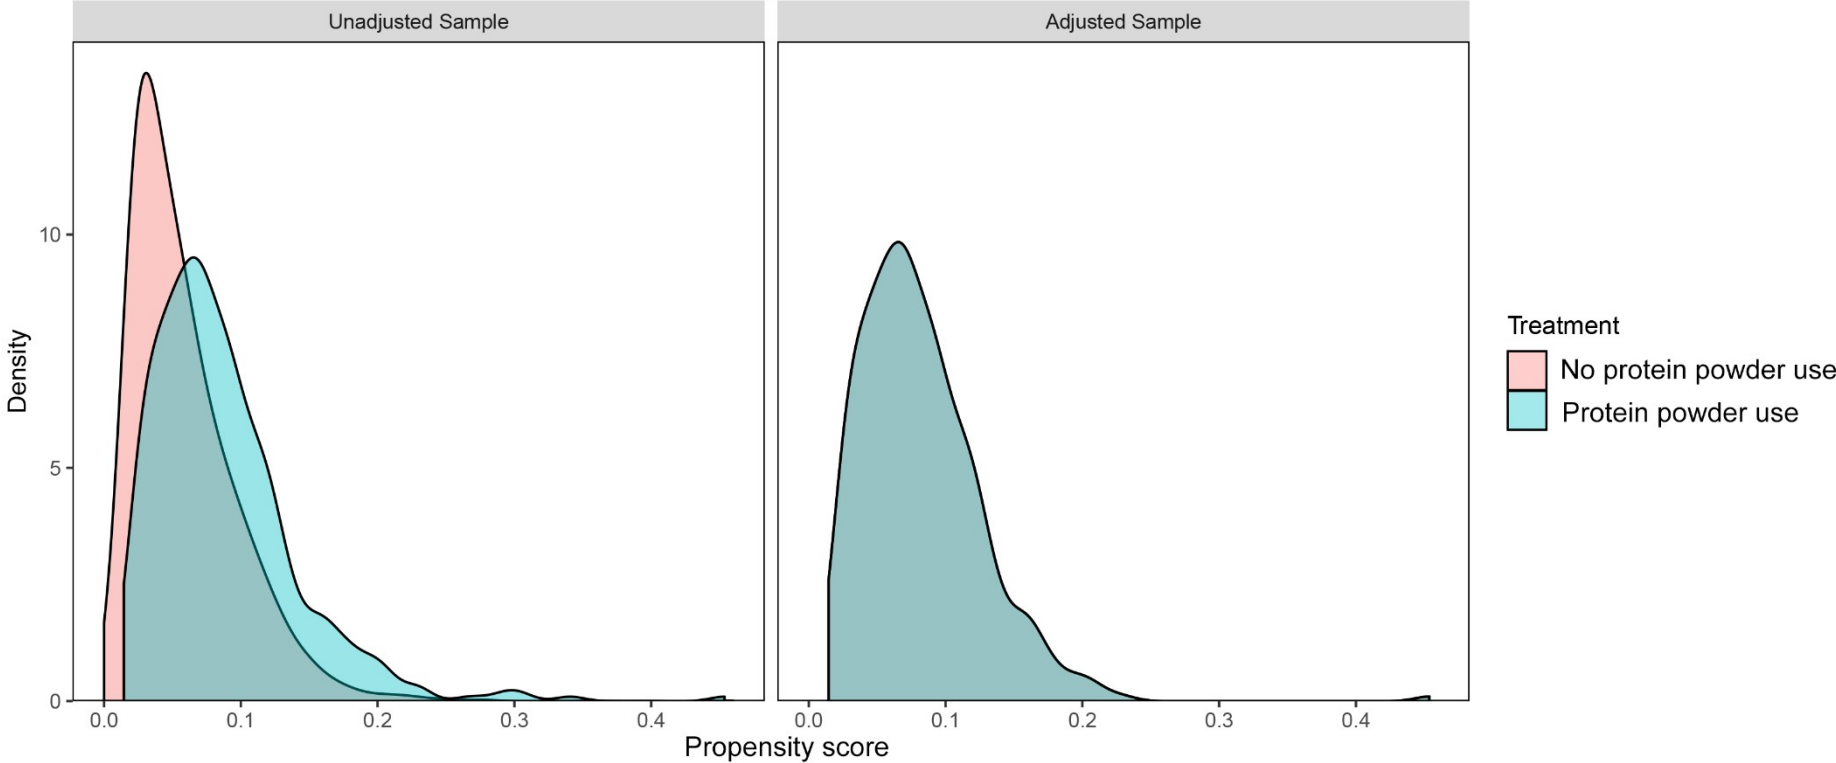

Figure S2. Distribution of propensity scores for participants who did and did not use the protein powder supplements in the unmatched and matched sample.

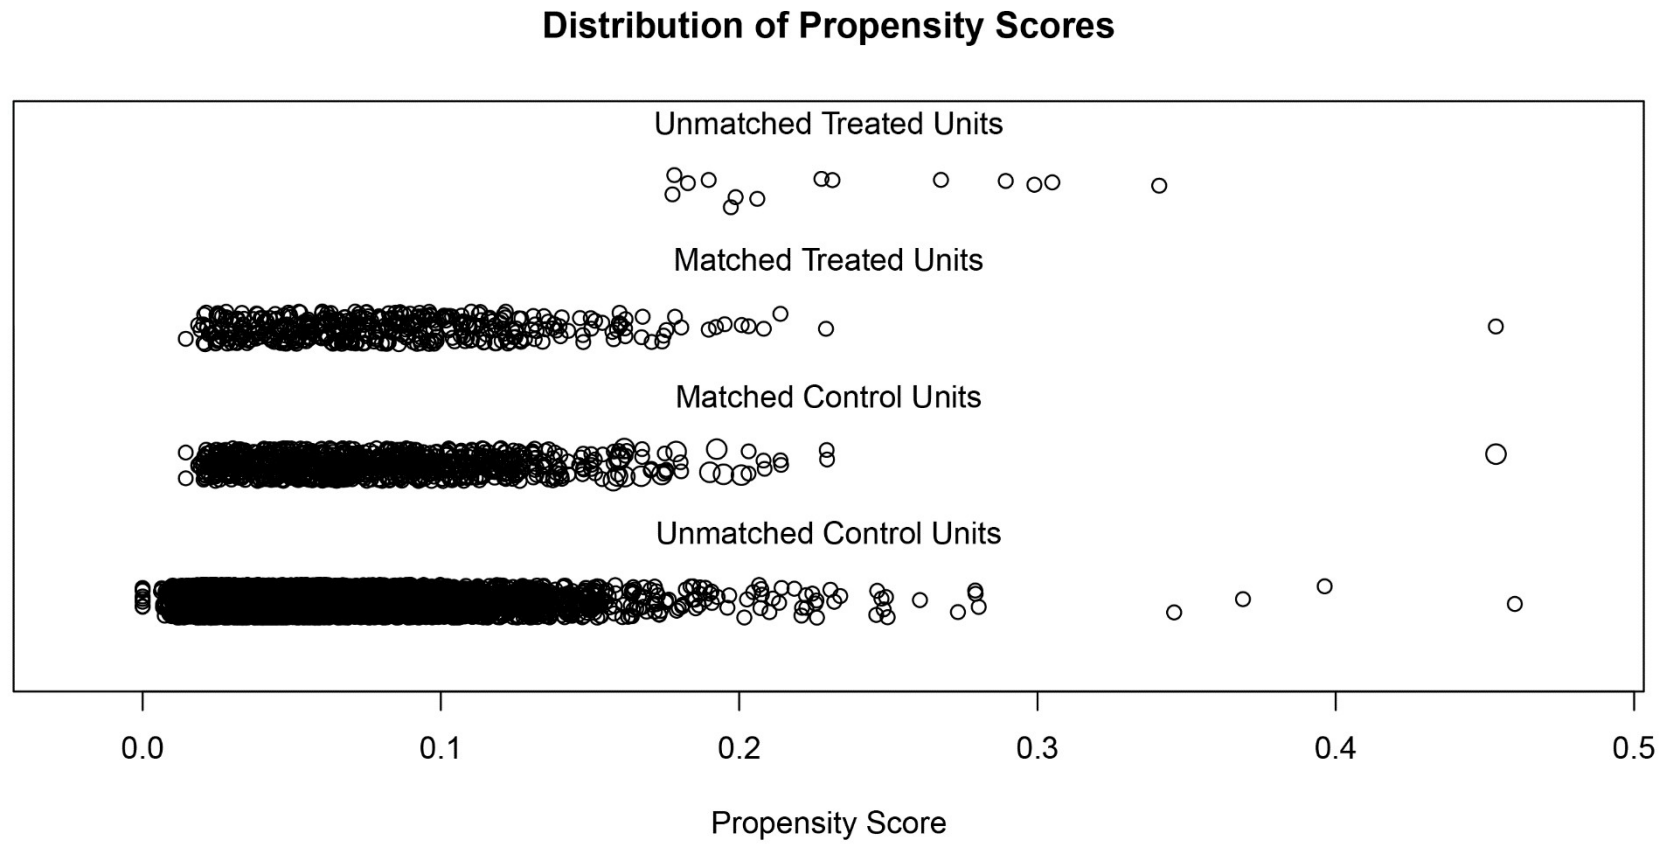

Figure S3. Standardized mean differences in the unmatched and matched sample.

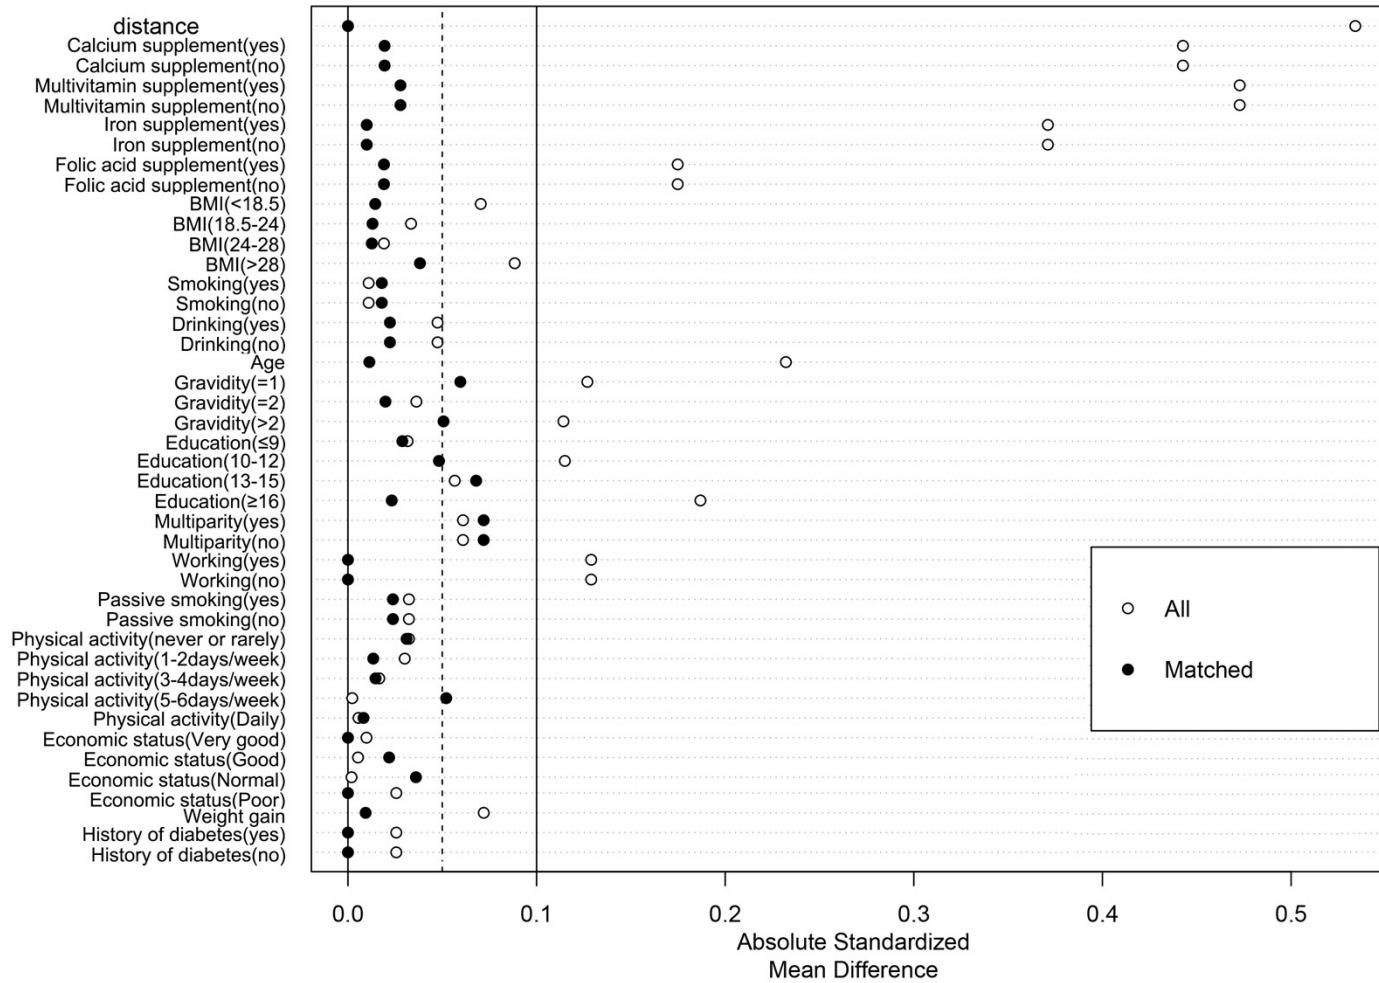

Table S1. Odds ratios (95%CI) for the association of protein powder supplementation and risk of GDM in subgroup analysis.

| Subgroups <sup>a</sup>                                | n    | OR (95%CI)      | <i>P</i> for interaction |
|-------------------------------------------------------|------|-----------------|--------------------------|
| Age                                                   |      |                 | 0.282                    |
| ≤29                                                   | 4624 | 1.66(1.15,2.35) |                          |
| 30-35                                                 | 2006 | 1.08(0.67,1.69) |                          |
| >35                                                   | 267  | 0.84(0.36,1.82) |                          |
| Pre-pregnancy BMI                                     |      |                 | 0.192                    |
| <18.5                                                 | 1475 | 0.87(0.39,1.72) |                          |
| 18.5-24                                               | 4602 | 1.32(0.94,1.81) |                          |
| >24                                                   | 820  | 2.20(1.12,4.24) |                          |
| Education level                                       |      |                 | 0.185                    |
| ≤9                                                    | 633  | 1.21(0.53,2.55) |                          |
| 10-12                                                 | 1182 | 1.35(0.73,2.37) |                          |
| >13                                                   | 5082 | 1.42(1.02,1.95) |                          |
| Physical activity during early pregnancy <sup>b</sup> |      |                 | 0.269                    |
| yes                                                   | 6170 | 1.43(1.08,1.88) |                          |
| no                                                    | 727  | 0.61(0.21,1.50) |                          |
| Economic status <sup>c</sup>                          |      |                 | 0.787                    |
| Good                                                  | 1425 | 1.22(0.61,2.25) |                          |
| Normal                                                | 5472 | 1.38(1.02,1.83) |                          |
| Gravidity                                             |      |                 | 0.778                    |
| 1                                                     | 4000 | 1.26(0.83,1.85) |                          |
| 2                                                     | 1667 | 1.16(1.02,1.95) |                          |
| ≥3                                                    | 1230 | 1.56(0.94,2.52) |                          |
| Parity                                                |      |                 | 0.328                    |
| 1                                                     | 6183 | 1.26(0.93,1.68) |                          |
| ≥2                                                    | 714  | 1.68(0.85,3.22) |                          |
| Work during early pregnancy                           |      |                 | 0.284                    |
| yes                                                   | 3475 | 1.56(1.04,2.29) |                          |
| no                                                    | 3422 | 1.21(0.83,1.72) |                          |

<sup>a</sup>Participants with smoking, drinking or family history of diabetes were too few to conduct subgroup analyses. <sup>b</sup>Answered never or rarely were defined as yes, and others were defined as no. <sup>c</sup>Answered good and very good were defined as good, and others were defined as normal.

Table S2. Association between protein powder supplementation and different time-point plasma glucose levels of OGTT.

| Plasma glucose<br>(mmol/L) | Crude model                 |              | Multivariable model <sup>a</sup> |          |
|----------------------------|-----------------------------|--------------|----------------------------------|----------|
|                            | Estimated change<br>(95%CI) | <i>P</i>     | Estimated change<br>(95%CI)      | <i>P</i> |
| FPG                        | <b>0.06(0.01,0.11)</b>      | <b>0.018</b> | 0.047(-0.0028,0.098)             | 0.064    |
| PG1H                       | 0.123(-0.04,0.285)          | 0.138        | 0.062(-0.096,0.221)              | 0.443    |
| PG2H                       | 0.067(-0.062,0.196)         | 0.310        | 0.029(-0.097,0.156)              | 0.648    |

<sup>a</sup>Adjusted for age, pre-pregnancy BMI, education level, economic status, smoking, passive smoking, alcohol drinking, gestational weight gain, work during early pregnancy, multiparity, gravidity, physical activity, family history of diabetes, and supplement with calcium, multivitamin, iron and folic acid.

Table S3. Odds ratios (95%CI) of protein powder supplementation for all variables included in the propensity score model.

|                                                          | Odds ratios (95%CI)<br>(N=6897) |
|----------------------------------------------------------|---------------------------------|
| Intercept                                                | 0.0029(0.0005-0.013)            |
| Age at delivery (years)                                  | 1.08(1.05-1.11)                 |
| Pre-pregnancy BMI (ref=<18.5)                            |                                 |
| 18.5-24                                                  | 0.82(0.65-1.05)                 |
| 24-28                                                    | 0.75(0.51-1.11)                 |
| >28                                                      | 0.41(0.12-1.02)                 |
| Education level (ref= $\leq$ 9)                          |                                 |
| 10-12                                                    | 1.11(0.76-1.66)                 |
| 13-15                                                    | 0.76(0.53-1.12)                 |
| $\geq$ 16                                                | 0.37(0.17-0.73)                 |
| Economic status (ref=Very good)                          |                                 |
| Good                                                     | 1.01(0.35-4.25)                 |
| Normal                                                   | 0.91(0.32-3.80)                 |
| Poor                                                     | 1.23(0.30-6.23)                 |
| Smoking                                                  | 0.56(0.88-1.98)                 |
| Passive smoking                                          | 1.04(0.81-1.33)                 |
| Alcohol drinking                                         | 1.21(0.61-2.16)                 |
| Gestational weight gain at delivery (kg)                 | 1.01(0.93-1.04)                 |
| Work during early pregnancy                              | 0.56(0.72-1.10)                 |
| Multiparity                                              | 1.08(0.53-1.14)                 |
| Gravidity (ref=1)                                        |                                 |
| =2                                                       | 1.08(0.84-1.38)                 |
| >2                                                       | 1.12(0.82-1.53)                 |
| Physical activity during pregnancy(ref= Never or rarely) |                                 |
| 1-2 days/week                                            | 1.04(0.65-1.65)                 |
| 3-4 days/week                                            | 0.96(0.59-1.55)                 |
| 5-6 days/week                                            | 1.17(0.43-2.67)                 |
| Daily                                                    | 0.86(0.62-1.20)                 |
| Family history of diabetes                               | 7.24(1.90-23.1)                 |
| Calcium supplement use                                   | 1.44(1.10-1.89)                 |
| Multivitamin supplement use                              | 1.98(1.51-2.62)                 |
| Iron supplement use                                      | 1.61(1.28-2.02)                 |
| Folic acid supplement use                                | 1.51(1.12-2.09)                 |

C-statistic=0.71
